# Supplementary material for: Morphological and Ultrastructural Collagen Defects: Impact and Implications in Dentinogenesis Imperfecta
Source: MDPI journal article supplement (doi:10.3390/dj11040095), 2023-04-03
Supplement: s1 [file s1]

**Supplementary Table S1.** Categories of search terms and their data base.

|        | Database                           | DI                     | OI                          | Collagen         |
|--------|------------------------------------|------------------------|-----------------------------|------------------|
| PubMed | Controlled vocabulary (MeSH terms) | Capdepont Teeth        | Brittle Bone                | Collagen         |
|        |                                    | Dentinogenesis Im-     | Fragilitas Ossium           |                  |
|        |                                    | perfecta               | Lobstein* Disease           |                  |
|        |                                    | Opalescent Dentin      | Osteogenesis Imperfecta     |                  |
|        | Free text terms                    | Capdepont teeth        |                             | Collagen         |
|        |                                    | Capdepont tooth        | Brittle bone                | Collagen fib*    |
|        |                                    | Dentinogenesis Im-     | Bruck syndrome*             | COL1A1           |
|        |                                    | perfecta               | Fragilitas Ossium           | COL1A2           |
|        |                                    | Dentin* Dysplasia      | Fibrogenesis imperfecta os- | Collagen type    |
|        |                                    | Dentin* Sialophos-     | sium                        | I                |
|        |                                    | phoprotein             | Lobstein* Disease           | Collagen type    |
|        |                                    | Opalescent Dentin*     | Osteogenesis Imperfecta     | II               |
|        |                                    | Opalescent teeth/tooth | Osteopsathyrosis*           | Collagen type IV |
| OVID   | Controlled vocabulary (MeSH terms) |                        |                             | Collagen         |
|        |                                    |                        |                             | Collagen type    |
|        |                                    | Dentin* Dysplasia      |                             | I                |
|        |                                    | Dentinogenesis Im-     | Osteogenesis Imperfecta     | Collagen type    |
|        | Free text terms                    | perfecta               |                             | II               |
|        |                                    |                        |                             | Collagen type    |
|        |                                    |                        |                             | IV               |
|        |                                    | Dentinogenesis Im-     | Brittle bone                | Collagen         |
|        |                                    | perfecta               | Bruck syndrome*             | Collagen fib*    |
|        |                                    | Dentin* Dysplasia      | Fragilitas Ossium           | COL1A1           |
|        |                                    | Dentin* Sialophos-     | Fibrogenesis imperfecta os- | COL1A2           |
|        |                                    | phoprotein             | sium                        |                  |

|        |                                  |                     |                         |               |
|--------|----------------------------------|---------------------|-------------------------|---------------|
| Teeth  |                                  | Opalescent Dentin*  | Lobstein* Disease       | Collagen type |
|        |                                  | Opalescent teeth    | Lobstein* syndrome      | I             |
|        |                                  | Opalescent tooth    | Osteogenesis Imperfecta | Collagen type |
|        |                                  |                     | Osteopsathyrosis*       | II            |
|        |                                  |                     |                         | Collagen type |
|        |                                  |                     |                         | IV            |
|        | MeSH teeth                       | Teeth tooth dentin* |                         |               |
|        | abnormality                      |                     |                         |               |
| Subdo- |                                  |                     |                         |               |
| main   | bond, mutant, disorder, genotype |                     |                         |               |

## Supplementary Data S1. Data Collection Form

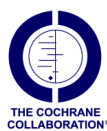

### Data collection form

|                           |
|---------------------------|
| <b>Review title or ID</b> |
|                           |

|                                                                                                                      |
|----------------------------------------------------------------------------------------------------------------------|
| <b>Study ID</b> ( <i>surname of first author and year first full report of study was published e.g. Smith 2001</i> ) |
|                                                                                                                      |

#### 1. General Information

|                                                                    |                         |
|--------------------------------------------------------------------|-------------------------|
| 1. <b>Date form completed</b><br>(dd/mm/yyyy)                      |                         |
| 2. <b>Name/ID of person extracting data</b>                        | Lubabah Gadi            |
| 3. <b>Report author contact details</b>                            |                         |
| 4. <b>Publication type</b><br>(e.g. full report, abstract, letter) | Full report             |
| 5. <b>Study funding source</b><br>(including role of funders)      |                         |
| <b>Possible conflicts of interest</b><br>(for study authors)       | declared as non present |
| 6. <b>Notes:</b>                                                   |                         |

#### 2. Reference Details:

|                               |               |  |
|-------------------------------|---------------|--|
| 1. <b>Authors</b>             |               |  |
| 2. <b>Year of Publication</b> |               |  |
| 3. <b>Journal details</b>     | <b>Name</b>   |  |
|                               | <b>Volume</b> |  |
|                               | <b>Issue</b>  |  |
|                               | <b>Pages</b>  |  |

### 3. Eligibility

| Study Characteristics                        | Review Inclusion Criteria                                                | Location in text |
|----------------------------------------------|--------------------------------------------------------------------------|------------------|
| 7. Type of study                             | rev                                                                      | --               |
|                                              | Case report                                                              |                  |
|                                              | Cross sectional /Laboratory                                              |                  |
| 8. Dental collagen tested:                   | Not specified                                                            |                  |
| 9. Types of lab test                         | <ul style="list-style-type: none"><li>•</li></ul>                        |                  |
| 10. Types of statistical test                | None                                                                     |                  |
| 11. Types of outcome measures                | <ul style="list-style-type: none"><li>•</li></ul>                        |                  |
| 12. Decision:                                | Included.                                                                |                  |
| 13. Reason for exclusion                     | --                                                                       |                  |
| 14. Notes:                                   | collagen ultrastructure not studied. Implication on collagen defect only |                  |
| DO NOT PROCEED IF STUDY EXCLUDED FROM REVIEW |                                                                          |                  |

### 4. Methods

|                               | Descriptions as stated in report/paper | Location in text |
|-------------------------------|----------------------------------------|------------------|
| 15. Aim of study              |                                        |                  |
| 16. Demineralization protocol |                                        |                  |
| 17. Examination tool          |                                        |                  |
| 18. Control teeth present?    |                                        |                  |
| 19. Notes:                    |                                        |                  |

## 5. Participants Population and setting

|                                             | Description                            | Location in text |
|---------------------------------------------|----------------------------------------|------------------|
| 20. Population description                  |                                        | Pg.              |
| 21. Inclusion criteria                      | collagen study of teeth with DI        | Pg.              |
| 22. Exclusion criteria                      | -                                      |                  |
| 23. Method/s of recruitment of participants | Undeclared (assume convenient sample?) |                  |
| 24. Age                                     |                                        | Pg.              |
| 25. Sex                                     |                                        | Pg.              |
| 26. DI type?                                |                                        | Pg.              |
| 27. OI presence (if yes, type?)             |                                        | Pg.              |
| 28. Co-morbidities                          |                                        | Pg.              |
| 29. Primary or permanent teeth:             |                                        | Pg.              |
| 30. Control teeth                           |                                        |                  |
| 31. Type of collagen examined               |                                        | Pg.              |
| 32. Notes:                                  |                                        |                  |

## 6. Results

|                                | Description as stated in report/paper | Location in text |
|--------------------------------|---------------------------------------|------------------|
| 33. Outcome name               |                                       | Pg.              |
| 34. Outcome                    |                                       | Pg.              |
| 35. Is outcome/tool validated? | Unclear<br><i>Yes/No/Unclear</i>      |                  |
| 36. Notes:                     |                                       |                  |

## 7. Applicability

|                                                          |                             |  |
|----------------------------------------------------------|-----------------------------|--|
| 37. Does the study directly address the review question? | No<br><i>Yes/No/Unclear</i> |  |
| 38. Notes:                                               |                             |  |

## Supplementary Data S2. Systematic Review Search Strategy

Date: 26/06/2020

Database: Embase <1974 to 2020 June 30>

- 1 ((Dentinogenesis adj3 Imperfecta) or dent\* dysplasia or opalescent dentin\* or opalescent teeth or opalescent tooth or dentin\* sialo-phosphoprotein).mp. [mp=title, abstract, heading word, drug trade name, original title, device manufacturer, drug manufacturer, device trade name, keyword, floating subheading word, candidate term word] (1571)
- 2 tooth/ or dentin\* / (38074)
- 3 Osteogenesis Imperfecta.tw. (5600)
- 4 ((Osteogenesis adj3 imperfecta) or Brittle bone or Bruck syndrome\* or Fibrogenesis imperfecta ossium or osteopsathyrosis or Lob-stein\* disease or Lobstein\* syndrome or fragilitas Ossium).mp. [mp=title, abstract, heading word, drug trade name, original title, device manu-facturer, drug manufacturer, device trade name, keyword, floating subheading word, candidate term word] (7496)
- 5 collagen.mp. [mp=title, abstract, heading word, drug trade name, original title, device manufacturer, drug manufacturer, device trade name, keyword, floating subheading word, candidate term word] (292263)
- 6 collagen fib\*.mp. [mp=title, abstract, heading word, drug trade name, original title, device manufacturer, drug manufacturer, device trade name, keyword, floating subheading word, candidate term word] (30454)
- 7 COL1A1.mp. [mp=title, abstract, heading word, drug trade name, original title, device manufacturer, drug manufacturer, device trade name, keyword, floating subheading word, candidate term word] (5884)
- 8 COL1A2.mp. [mp=title, abstract, heading word, drug trade name, original title, device manufacturer, drug manufacturer, device trade name, keyword, floating subheading word, candidate term word] (2209)
- 9 (((((Collagen adj3 type II) or collagen) adj3 type two) or collagen) adj3 type 2).mp. [mp=title, abstract, heading word, drug trade name, original title, device manufacturer, drug manufacturer, device trade name, keyword, floating subheading word, candidate term word] (16378)
- 10 (((((collagen adj3 type I) or collagen) adj3 type one) or collagen) adj3 type 1).mp. [mp=title, abstract, heading word, drug trade name, original title, device manufacturer, drug manufacturer, device trade name, keyword, floating subheading word, candidate term word] (50457)
- 11 (((((collagen adj3 type IV) or collagen) adj3 type 4) or collagen) adj3 type four).mp. [mp=title, abstract, heading word, drug trade name, original title, device manufacturer, drug manufacturer, device trade name, keyword, floating subheading word, candidate term word] (0)
- 12 (Bond or Mutant or Disorder or genotype).mp. [mp=title, abstract, heading word, drug trade name, original title, device manufacturer, drug manufacturer, device trade name, keyword, floating subheading word, candidate term word] (2954792)

- 13      Dentinogenesis Imperfecta/ or dent\* dysplasia.mp. [mp=title, abstract, heading word, drug trade name, original title, device manufacturer, drug manufacturer, device trade name, keyword, floating subheading word, candidate term word] (7386)
- 14      collagen type 2/ or nonfibrillar collagen/ or collagen disease/ or collagen fiber/ or collagen synthesis/ or fibrillar collagen/ or collagen defect/ or collagen type 1/ or collagen/ or collagen type 4/ or fibril associated collagen/ or collagen fibril/ (209137)
- 15      1 or 13 (8310)
- 16      3 or 4 (7496)
- 17      2 and 15 (825)
- 18      5 or 14 (292263)
- 19      17 and 18 (24)
- 20      6 or 14 (216680)
- 21      17 and 20 (18)
- 22      7 or 14 (211504)
- 23      17 and 22 (17)
- 24      8 or 14 (209942)
- 25      17 and 24 (18)
- 26      10 and 17 (8)
- 27      9 and 17 (0)
- 28      11 and 17 (0)
- 29      12 and 17 (221)

Annotation: ASAS the subdomain

29 = 17 (DI & teeth) + subdomains

- 30      18 and 29 (7)
- 31      7 and 29 (1)
- 32      22 and 29 (6)
- 33      8 and 29 (2)
- 34      24 and 29 (7)
- 35      9 and 29 (0)
- 36      10 and 29 (3)

|    |                 |
|----|-----------------|
| 37 | 11 and 29 (0)   |
| 38 | 6 and 29 (1)    |
| 39 | 15 and 16 (366) |
| 40 | 2 and 39 (26)   |
| 41 | 18 and 40 (9)   |
| 42 | 6 and 40 (1)    |
| 43 | 7 and 40 (2)    |
| 44 | 22 and 40 (7)   |
| 45 | 8 and 40 (2)    |
| 46 | 24 and 40 (8)   |
| 47 | 9 and 40 (0)    |
| 48 | 10 and 40 (3)   |
| 49 | 11 and 40 (0)   |
| 50 | 7 and 17 (3)    |
| 51 | 8 and 17 (2)    |
| 52 | 6 and 17 (3)    |

Date: 26/06/2020

Database: Ovid MEDLINE(R) and Epub Ahead of Print, In-Process & Other Non-Indexed Citations and Daily <1946 to June 26, 2020>

- 1 dentin dysplasia/ or Dentinogenesis Imperfecta/ (706)
- 2 ((Dentinogenesis adj3 Imperfecta) or dent\* dysplasia\* or Hereditary Dentinogenesis Imperfecta or opalescent dentin\* or opalescent teeth or opalescent tooth or dentin\* sialophosphoprotein).mp. [mp=title, abstract, original title, name of substance word, subject heading word, floating sub-heading word, keyword heading word, organism supplementary concept word, protocol supplementary concept word, rare disease supplementary concept word, unique identifier, synonyms] (1852)
- 3 1 or 2 (1852)
- 4 Osteogenesis Imperfecta.tw. (4728)
- 5 ((Osteogenesis adj3 imperfecta) or Brittle bone or Bruck syndrome\* or Fibrogenesis imperfecta ossium or Osteopsathyrosis or Lobstein\* disease or Fragilitas Ossium or Lobstein\* syndrome).mp. (5897)
- 6 4 or 5 (5897)
- 7 tooth/ or dentin\*/ (23597)
- 8 Collagen Type I/ or Collagen Type IV/ or Collagen/ or Collagen Type II/ (112224)
- 9 collagen.mp. [mp=title, abstract, original title, name of substance word, subject heading word, floating sub-heading word, keyword heading word, organism supplementary concept word, protocol supplementary concept word, rare disease supplementary concept word, unique identifier, synonyms] (220548)
- 10 collagen fib\*.mp. [mp=title, abstract, original title, name of substance word, subject heading word, floating sub-heading word, keyword heading word, organism supplementary concept word, protocol supplementary concept word, rare disease supplementary concept word, unique identifier, synonyms] (21407)
- 11 COL1A1.mp. [mp=title, abstract, original title, name of substance word, subject heading word, floating sub-heading word, keyword heading word, organism supplementary concept word, protocol supplementary concept word, rare disease supplementary concept word, unique identifier, synonyms] (3301)
- 12 COL1A2.mp. [mp=title, abstract, original title, name of substance word, subject heading word, floating sub-heading word, keyword heading word, organism supplementary concept word, protocol supplementary concept word, rare disease supplementary concept word, unique identifier, synonyms] (1374)

- 13 (((((collagen adj3 type I) or collagen) adj3 type one) or collagen) adj3 type 1).mp. [mp=title, abstract, original title, name of substance word, subject heading word, floating sub-heading word, keyword heading word, organism supplementary concept word, protocol supplementary concept word, rare disease supplementary concept word, unique identifier, synonyms] (2412)
- 14 (collagen type four or collagen type 4 or collagen type IV).mp. [mp=title, abstract, original title, name of substance word, subject heading word, floating sub-heading word, keyword heading word, organism supplementary concept word, protocol supplementary concept word, rare disease supplementary concept word, unique identifier, synonyms] (5538)
- 15 (collagen type two or collagen type 2 or collagen type II).mp. [mp=title, abstract, original title, name of substance word, subject heading word, floating sub-heading word, keyword heading word, organism supplementary concept word, protocol supplementary concept word, rare disease supplementary concept word, unique identifier, synonyms] (6741)
- 16 3 and 7 (107)
- 17 8 or 9 (220548)
- 18 16 and 17 (21)
- 19 8 or 10 (124109)
- 20 16 and 19 (12)
- 21 8 or 11 (114017)
- 22 16 and 21 (12)
- 23 8 or 12 (112817)
- 24 16 and 23 (12)
- 25 8 or 13 (113576)
- 26 16 and 25 (12)
- 27 8 or 15 (113541)
- 28 16 and 27 (12)
- 29 8 or 14 (113253)
- 30 16 and 29 (12)
- 31 2 and 6 (283)
- 32 (Bond or Mutant or Disorder or genotype).mp. [mp=title, abstract, original title, name of substance word, subject heading word, floating sub-heading word, keyword heading word, organism supplementary concept word, protocol supplementary concept word, rare disease supplementary concept word, unique identifier, synonyms] (1457933)
- 33 16 and 32 (15)

|    |                    |
|----|--------------------|
| 34 | 17 and 33 (3)      |
| 35 | 19 and 33 (3)      |
| 36 | 21 and 33 (3)      |
| 37 | 23 and 33 (3)      |
| 38 | 25 and 33 (3)      |
| 39 | 27 and 33 (3)      |
| 40 | 29 and 33 (3)      |
| 41 | 3 and 6 and 7 (13) |
| 42 | 17 and 41 (4)      |
| 43 | 19 and 41 (3)      |
| 44 | 21 and 41 (3)      |
| 45 | 23 and 41 (3)      |
| 46 | 25 and 41 (3)      |
| 47 | 27 and 41 (3)      |
| 48 | 29 and 41 (3)      |

Date: Done on 26/06/2020 and re-run on 30/06/2020.

Database: PubMed Medline

1 (((((((Dentinogenesis Imperfecta[Text Word]) OR Opalescent Dentin\*[Text Word]) OR Opalescent tooth[Text Word]) OR Opalescent teeth[Text Word]) OR Capdepont Teeth[Text Word]) OR Capdepont Tooth[Text Word]) OR Dentin\* dysplasia[Text Word]) OR Dentin Sialophosphoprotein[Text Word]) OR Dentinogenesis Imperfecta[MeSH Terms] (2062)

2((((((((Osteogenesis Imperfecta[Text Word]) OR Brittle bone[Text Word]) OR Lobstein\* Disease[Text Word]) OR Bruck syndrome\*[Text Word]) OR fibrogenesis imperfecta ossium[Text Word]) OR osteopsathyrosis[Text Word]) OR Fragilitas Ossium[Text Word]) OR Osteogenesis Imperfecta[MeSH Terms] (5937)

3 (((teeth[Text Word]) OR tooth[Text Word]) OR dentin\*[Text Word]) OR abnormality, teeth[MeSH Terms] (241641)

4 (((bond[Text Word]) OR mutant[Text Word]) OR disorder[Text Word]) OR genotype[Text Word] (1454295)

5 1 and 3 (2061)

6 1 and 3 and 4 (255)

7 collagen[Text Word] (220087)

8 COL1A1[Text Word] (3308)

9 COL1A2[Text Word] (1365)

10 collagen fib\*[Text Word] (21298)

11 ((collagen type 1[Text Word]) OR (collagen type one[Text Word])) OR (collagen type I[Text Word]) (21149)

12 ((collagen type 2[Text Word]) OR (collagen type two[Text Word])) OR (collagen type II[Text Word]) (6739)

13 ((collagen type 4[Text Word]) OR (collagen type four[Text Word])) OR (collagen type IV[Text Word]) (5534)

14 5 and 7 (356)

15 5 and 10 (33)

16 5 and 11 (158)

17 5 and 12 (6)

18 5 and 13 (1)

19 5 and 8 (72)

20 5 and 9 (56)

21 6 and 7 (76)

22 6 and 10 (7)

23 6 and 11 (36)

24 6 and 12 (1)

25 6 and 13 (0)

26 6 and 8 (32)

27 6 and 9 (32)

28 1 and 2 (278)

29 28 and 3 (78)

30 29 and 7 (126)

31 29 and 10 (12)

32 29 and 11 (53)

33 29 and 12 (1)

34 29 and 13 (0)

35 29 and 8 (50)

36 29 and 9 (53)
